# Supplementary material for: Grazing Effects of Soil Fauna on White-Rot Fungi: Biomass, Enzyme Production and Litter Decomposition Ability
Source: MDPI journal article supplement (doi:10.3390/jof8040348), 2022-03-28
Supplement: s1 [file s1]

Supplementary:

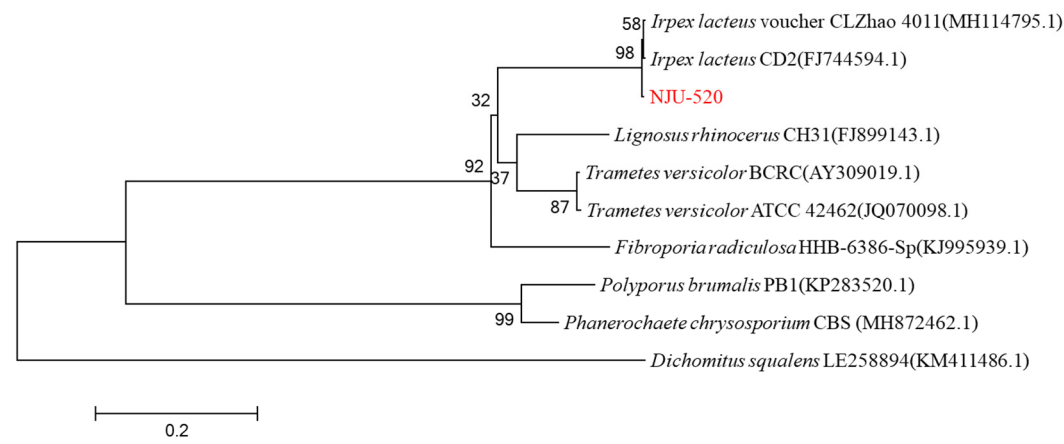

**Figure S1.** Construction of phylogenetic tree of NJU-520 and similar strains by neighbor-joining method. The GenBank accession numbers for each strain were listed in parenthesis. The phylogenetic tree was constructed by MEGA-X, and the scale bar represents 0.2 nucleotide substitution per nucleotide position.

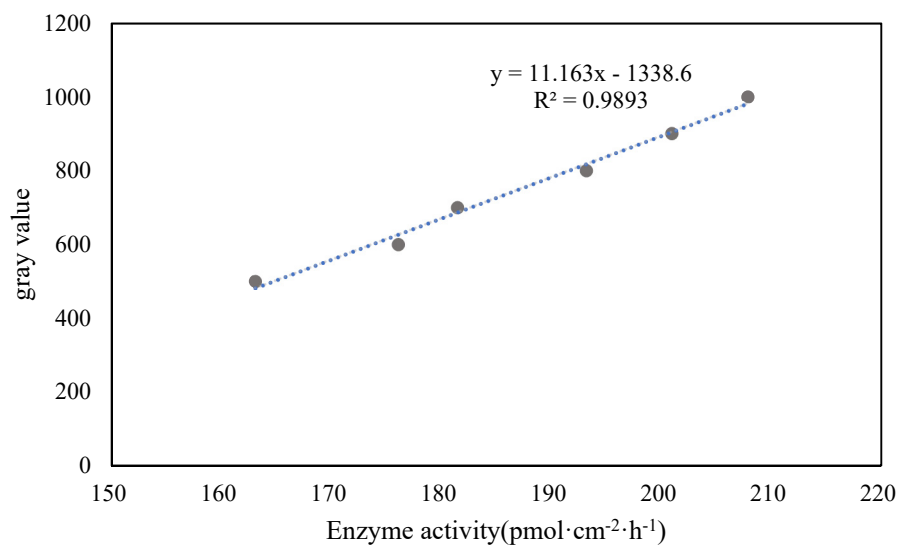

**Figure S2.** The standard curve of the correlation of zymography.

**Table S1.** The hotspots in the zymogram of the grazing area at 7 days, 21 days, 42 days and 70 days (%).

| Enzyme                           | Treatment            |          | Day          |              |              |             |
|----------------------------------|----------------------|----------|--------------|--------------|--------------|-------------|
|                                  |                      |          | 7            | 21           | 42           | 70          |
| Acid phosphatase                 | <i>Q. variabilis</i> | +Isopods | 58.55±1.38ab | 63.70±3.75bc | 60.06±3.75bc | 37.92±5.64a |
|                                  |                      | -Isopods | 53.45±1.16a  | 50.12±3.89ab | 43.13±1.56a  | 52.35±1.93a |
|                                  | <i>P. massoniana</i> | +Isopods | 62.50±1.43b  | 64.61±2.05c  | 49.37±2.45ab | 48.92±1.60a |
|                                  |                      | -Isopods | 57.13±0.40a  | 44.55±1.96a  | 45.52±0.83a  | 41.79±2.32a |
| $\beta$ -N-acetylhexosaminidases | <i>Q. variabilis</i> | +Isopods | 54.25±0.13a  | 66.40±3.42a  | 60.27±2.66b  | 61.40±2.05b |
|                                  |                      | -Isopods | 54.56±0.67a  | 50.88±7.50a  | 46.72±2.65a  | 55.26±3.53b |
|                                  | <i>P. massoniana</i> | +Isopods | 53.09±1.69a  | 64.67±7.11a  | 60.80±2.12b  | 57.14±0.93b |
|                                  |                      | -Isopods | 53.85±2.22a  | 41.17±5.48a  | 45.36±1.68a  | 42.58±1.80a |

|                          |                      |          |             |              |             |              |
|--------------------------|----------------------|----------|-------------|--------------|-------------|--------------|
| $\beta$ -1,4-glucosidase | <i>Q. variabilis</i> | +Isopods | 60.22±1.54a | 66.18±4.11b  | 66.00±1.88b | 62.48±3.03b  |
|                          |                      | -Isopods | 56.29±2.01a | 52.15±3.79ab | 50.61±5.66a | 55.03±4.24ab |
|                          | <i>P. massoniana</i> | +Isopods | 59.10±3.04a | 58.93±3.23ab | 66.68±1.58b | 61.32±0.81ab |
|                          |                      | -Isopods | 57.84±3.73a | 45.50±5.80a  | 47.19±1.89a | 48.14±2.58a  |

**Table S2.** List of chemicals

| Chemical                                                | Company                                                  | Producer                                       |
|---------------------------------------------------------|----------------------------------------------------------|------------------------------------------------|
| potato extract                                          | Qingdao Hope Bio-Technology Co., Ltd.                    | hopebio                                        |
| glucose                                                 | Sinopharm Chemical Reagent Co., Ltd.                     | SCR                                            |
| agar                                                    | Guangzhou saiguo biotech Co., Ltd.                       | Biofroxx                                       |
| aniline Blue                                            | Shanghai yuanye Bio-Technology Co., Ltd.                 | Yuanye Bio-Technology                          |
| ammonium sulfate                                        | Sinopharm Chemical Reagent Co., Ltd.                     | SCR                                            |
| magnesium sulphate                                      | Shanghai Macklin Biochemical Co., Ltd.                   | Macklin                                        |
| potassium dihydrogen phosphate                          | Guangzhou Jinhua Chemical Reagent Co., Ltd.              | Guangdong<br>Guanghua<br>Sci-Tech<br>Co., Ltd. |
| sodium carboxymethyl cellulose                          | Sinopharm Chemical Reagent Co., Ltd.                     | SCR                                            |
| sodium chloride                                         | Sinopharm Chemical Reagent Co., Ltd.                     | SCR                                            |
| Congo Red                                               | Beijing J&K Scientific Co., Ltd.                         | J&K<br>Scientific                              |
| nalidixic acid                                          | Shanghai yuanye Bio-Technology Co., Ltd.                 | Yuanye Bio-Technology                          |
| methanol                                                | Sinopharm Chemical Reagent Co., Ltd.                     | SCR                                            |
| petroleum                                               | Shanghai Aladdin Biochemical Technology Co., Ltd.        | Aladdin                                        |
| ethanol                                                 | Shanghai Macklin Biochemical Co., Ltd.                   | Macklin                                        |
| p-nitrophenyl- $\beta$ -D-glucoside                     | Nanjing Duly Biotech Co., Ltd.                           | BioDuly                                        |
| sodium carbonate                                        | Xilong Scientific Co., Ltd.                              | Xilong<br>Scientific                           |
| p-nitrophenyl-phosphate                                 | Shanghai Kaiwei Chemical Co., Ltd.                       | Kaiwei<br>Chemical                             |
| 4-Methylumbelliferyl- $\beta$ -D-glucoside              | Shanghai Aladdin Biochemical Technology Co., Ltd.        | Aladdin                                        |
| 4-Methylumbelliferyl-phosphate                          | Shanghai Aladdin Biochemical Technology Co., Ltd.        | Aladdin                                        |
| 4-Methylumbelliferyl-N-acetyl- $\beta$ -D-glucosaminide | Shanghai D&B Biological Science and Technology Co., Ltd. | D&B                                            |
| 4-methylumbelliferone                                   | Shanghai Aladdin Biochemical Technology Co., Ltd.        | Aladdin                                        |
